# Supplementary material for: Cloning and Characterisation of Multiple Ferritin Isoforms in the Atlantic Salmon (Salmo salar)
Source: PubMed Central journal article supplement (PMC4117605; doi:10.1371/journal.pone.0103729), 2014-07-31
Supplement: pone.0103729.s002.pdf [file pone.0103729.s002.pdf]

# Figure S2

|                              | 10      | 20              | 30         | 40          | 50         | 60         | 70                       | 80         | 90          | 100         |
|------------------------------|---------|-----------------|------------|-------------|------------|------------|--------------------------|------------|-------------|-------------|
| <b>H1</b>                    | --M---- | TS- QVRQNFHQDC  | EAAINRQINL | ELYASYVYLS  | M--AYYFDRD | DQALHNFAKF | FKNQSH <del>EE</del> RE  | HAEKLMKVQN | QRGGRIFLQD  | VKKPEKDEWG  |
| <b>H2</b>                    | --M---- | TS- QVRQNFHQDC  | EAAINRQINL | ELYASYVYLS  | M--AYYFDRD | DQALHNFAKF | FKNQSH <del>EE</del> RE  | HAEKLLTVQN | QRGGRIFLQD  | VKKPEKDEWG  |
| <i>D. rerio</i> 4            | --M---- | SS- QVRQNFEEAC  | EAAVNRQINM | ELYASYVYLS  | M--SYFDRD  | DQALHNFAKF | FRHQSH <del>EE</del> RE  | HAEKLMKFQN | QRGGRIFLQD  | VKKPEKDEWG  |
| <i>T. bernacchii</i> H       | --M---- | ES- QVRQNFHKDC  | EAAINRQINL | ELYASYSYLS  | M--AYYFDRD | DVALPGFAHF | FKQSE <del>EE</del> RE   | HAEKLLKFQN | QRGGRIFLQD  | VKKPDRDEWG  |
| <i>T. newnesi</i> H          | --M---- | ES- QVRQNFHKDC  | EAAINRQINL | ELYASYSYLS  | M--AYYFDRD | DVALPGFAHF | FKHQSE <del>EE</del> RE  | HAEKLMKQQN | QRGGRIFLQD  | VKKPDRDEWG  |
| <i>D. labrax</i> H           | --M---- | SS- QVRQNFHQDC  | EAAINRQINL | ELYASYVYLS  | M--AYYFDRD | DQALHNFAKF | FRNQSH <del>EE</del> RE  | HAEKLMKVQN | QRGGRIFLQD  | IRKPERDEWG  |
| <i>S. maximus</i> H          | --M---- | SS- QVRQNFHQDC  | EAAINRQINL | ELYASYVYLS  | M--GYFDRD  | DQALHNFAKF | FRNQSH <del>EE</del> RE  | HAEKLMKLQN | QRGGRIFLQD  | IRKPERDEWG  |
| <i>P. crocea</i> H           | --M---- | SS- QVRQNFHQDC  | EAAVNRQINL | ELYASYVYLS  | M--AYYFDRD | DQALHNFAKF | FRNQSH <del>EE</del> RE  | HAEKLMKLQN | QRGGRIFLQD  | IRKPERDEWG  |
| <i>S. salar</i> H            | --M---- | TS- QVRQNFHQDC  | EAAINRQINL | ELYASYVYLS  | M--AYYFDRD | DQALHNFAKF | FKNQSH <del>EE</del> RE  | HAEKLMKVQN | QRGGRIFLQD  | VKKPEKDEWG  |
| <i>X. tropicalis</i> 3       | --M---- | TS- QVRQNYHQDC  | EAAINRQINL | ELYASYVYLS  | M--AYYFDRD | DVALKNFAKF | FLHQSH <del>EE</del> RE  | HAEKLMKQVN | QRGGRIFLQD  | VKKPDRDEWA  |
| <i>H. sapiens</i> H          | --MTTAS | TS- QVRQNYHQDS  | EAAINRQINL | ELYASYVYLS  | M--SYFDRD  | DVALKNFAKY | FLHQSH <del>EE</del> RE  | HAEKLMKLQN | QRGGRIFLQD  | IKKPDCDDWE  |
| <i>M. musculus</i> H         | --MTTAS | PS- QVRQNYHQDA  | EAAINRQINL | ELYASYVYLS  | M--SCYFDRD | DVALKNFAKY | FLHQSH <del>EE</del> RE  | HAEKLMKLQN | QRGGRIFLQD  | IKKPDRDDWE  |
| <i>R. norvegicus</i> H       | --MTTAS | PS- QVRQNYHQDS  | EAAINRQINL | ELYASYVYLS  | M--SCYFDRD | DVALKNFAKY | FLHQSH <del>EE</del> RE  | HAEKLMKLQN | QRGGRIFLQD  | IKKPDRDDWE  |
| <i>B. taurus</i> H           | --MTTAS | PS- QVRQNYHQDS  | EAAINRQINL | ELYASYVYLS  | M--SYFDRD  | DVALKNFAKY | FLHQSH <del>EE</del> RE  | HAERLMKLQN | QRGGRIFLQD  | IKKPDRDDWE  |
| <i>E. caballus</i> H         | --MTTAF | PS- QVRQNYHQDS  | EAAINRQINL | ELHASVYVLS  | M--SFYFDRD | DVALKNFAKY | FLHQSH <del>EE</del> RE  | HAEKLMKLQN | QRGGRIFLQD  | IKKPDQDDWE  |
| <b>M1</b>                    | --M---- | ES- QIRQNYHHDC  | EAAINRMINM | EMFASYTYTS  | M--AFYFDRD | DVALPGFAHF | FKENS <del>DE</del> ERE  | HADKLLSFQN | KRGGRIILLQD | IKKPERDEWG  |
| <b>M2</b>                    | MKM---- | KS- QVRQNYHDDC  | EVAINRMINM | EMFASYTYTS  | M--AFYFDRD | DVALPGFAHF | FKENS <del>DE</del> ERE  | HADKLLSFQN | KRGGRIILLQD | IKKPERDEWG  |
| <b>M3</b>                    | MKI---- | ES- QIRQNYHDDC  | EVAINRMINM | EMFASYTYTS  | M--AFYFDRD | DVALPGFAHF | FKENS <del>DE</del> ERE  | HADKLLSFQN | KRGGRIILLQD | ITKPERDEWG  |
| <i>D. rerio</i> 1            | --M---- | ETS- QIRQNYARDS | EAAINKMINL | ELYAGTYTYS  | M--AHYFKRD | DVALPGFAKF | FKKNSE <del>EE</del> ERE | HAEKFMEFQN | KRGGRIILLQD | IKKPDRDVWG  |
| <i>D. rerio</i> 2            | --M---- | DS- QVRQNYDRDC  | EALINKMINL | ELYAGTYTYS  | MATAFYFDRD | DVALPGFAKF | FKKNSE <del>EE</del> ERE | HAEKFMEFQN | KRGGRIILLQD | IKKPERDEWD  |
| <i>D. rerio</i> 3            | --M---- | ETC- QIRQNYSDC  | EALINKMINL | ELYAGTYTYS  | M--AHYFKRD | DVALPGFAKF | FKNNSE <del>EE</del> ERE | HAEKFMEFQN | KRGGRIILLQD | IKKPGRDVWD  |
| <i>D. rerio</i> 5            | --M---- | ETS- QVRQNYARDS | EAAINKMINL | ELYAGTYTYS  | MASAHYFKRD | DVALPGFAKF | FKKNSE <del>EE</del> ERE | HAEKFMEFQN | KRGGRIILLQD | IKKPDRDVWG  |
| <i>T. bernacchii</i> M (spl) | --M---- | DS- QVRQNYHRDC  | EAAVNRMINM | ELFASYSYTS  | M--AFYFDRD | DVALPGFAHF | FKENS <del>DE</del> ERE  | HADKLLTFQN | SRGGRIILLQD | IKKPERDEWG  |
| <i>T. bernacchii</i> M (liv) | --M---- | DS- QVRQNYHRDC  | EAAVNRMINM | ELFASYSYTS  | M--AFYFDRD | DVALPGFAHF | FKENS <del>DE</del> ERE  | HADKLLTFQN | SRGGRIILLQD | IKKPERDEWG  |
| <i>T. newnesi</i> M          | --M---- | DS- QVRQNYHRDC  | EAAVNRMINM | ELFASYSYTS  | M--AFYFDRD | DVALPGFAHF | FKENS <del>DE</del> ERE  | HADKLLTFQN | SRGGRIILLQD | IKKPERDEWG  |
| <i>S. maximum</i> M          | --M---- | ES- QVRQNYNRDC  | EAAVNRMVNM | ELFASYTYTS  | M--AFYFDRD | DVALPGFSHF | FKENSE <del>EE</del> ERE | HADKLLSFQN | NRGGRIILLQD | VKKPEKDEWG  |
| <i>P. crocea</i> M           | --M---- | ES- QVRQNYHRDC  | EAAINRMVNM | ELFASYTYTS  | M--AFYFDRD | DVALPGFSHF | FKENS <del>DE</del> ERE  | HAQKLLSFQN | KRGGRIILLQD | VKKPERDEWG  |
| <i>S. ocellatus</i> M        | --M---- | ES- QVRQNYHRDC  | EAAINRMVNM | ELFASYTYTS  | M--AFYFDRD | DVALPGFSHF | FKENS <del>DE</del> ERE  | HAQKLLSFQN | KRGGRIILLQD | VKKPERDEWG  |
| <i>O. mykiss</i> H1          | --M---- | ES- QIRQNYHHDC  | EAAINRMINL | EMFASYTYTS  | M--AFYFDRD | DVALRGFAHF | FKENS <del>DE</del> ERE  | HAEKLLSFQN | KRGGRIILLQD | IKKPERDEWG  |
| <i>O. mykiss</i> H2          | --M---- | ES- QIRQNYHHDC  | EAAINRMINL | EMFASYTYTS  | M--AFYFDRD | DVALSGFAHF | FKENS <del>DE</del> ERE  | HADKLLSFQN | KRGGRIILLQD | IKKPERDEWG  |
| <i>O. mykiss</i> H3          | --M---- | ES- QIRQNYHHDC  | EAAINRMINL | EMFASYTYTS  | M--AFYFDRD | DVALRGFAHF | FKENS <del>DE</del> ERE  | HADKLLSFQN | KRGGRIILLQD | IKKPERDEWG  |
| <i>S. salar</i> M            | --M---- | ES- QIRQNYHHDC  | ERAINRMINM | EMFASYTYTS  | M--AFYFDRD | DVALPGFAHF | FKENSE <del>EE</del> ERE | HADKLLSFQN | KRGGRIILLQD | IKKPERDEWG  |
| <i>X. tropicalis</i> 1       | --M---- | IS- QVRQNYSHDC  | EAAVNRMINM | EMFASYTYLS  | M--SHYFDRD | DVALHHVAEF | FKEQSK <del>EE</del> ERE | CAEKLMKCQN | KRGGRIILLQD | IKKPERDEWG  |
| <i>X. tropicalis</i> 2       | MSA---- | QS- QIRQNYHEES  | EAGINRIANL | ELQTSYVYLS  | L--GYFDRD  | DVALSKFSKY | YRELSEKKRD               | HAEDLLKFQN | KRGGRIILLQD | IKKPDADDEWG |
| <i>X. tropicalis</i> 4       | --M---- | QS- QVRQNFNSDC  | EAAINRMVNM | ELYASYVYLS  | M--SYFDRD  | DVALHHVAKF | FKEQSH <del>EE</del> ERE | HAEKFLKYQN | KRGGRIILLQD | IKKPERDEWG  |
| <i>H. sapiens</i> L          | --M---- | SS- QIRQNYSTDV  | EAAVNSLVNL | YLQASYTYLS  | L--GFYFDRD | DVALEGVSHF | FRELAE <del>EE</del> KRE | GYERLLKMQN | QRGGRIILLQD | IKKPAEDEWG  |
| <i>M. musculus</i> L         | --M---- | TS- QIRQNYSTEV  | EAAVNRVLNL | HLRASVYTYLS | L--SHYFDRD | DVALEGVGHF | FRELAE <del>EE</del> KRE | GAERLLEFQN | DRGGRIILLQD | VQKPSQDEWG  |
| <i>R. norvegicus</i> L       | --M---- | TS- QIRQNYSTEV  | EAAVNRVLNL | HLRASVYTYLS | L--GFFDRD  | DVALEGVGHF | FRELAE <del>EE</del> KRE | GAERLLKLN  | ERGGRIILLQD | VQKPSQDEWG  |
| <i>B. taurus</i> L           | --M---- | SS- QIRQNYSTEV  | EAAVNRVLNL | QLRASVYTYLS | L--GFYFDRD | DVALEGVGHF | FRELAE <del>EE</del> KRE | GAERLLKLN  | QRGGRIILLQD | VQKPSQDEWG  |
| <i>E. caballus</i> L         | --M---- | SS- QIRQNYSTEV  | EAAVNRVLNL | YLRASVYTYLS | L--GFYFDRD | DVALEGVGHF | FRELAE <del>EE</del> KRE | GAERLLKMQN | QRGGRIILLQD | LQKPSQDEWG  |
| <i>P. marinus</i>            | --M---- | TS- QVRQNYAQDV  | EAAINRQINM | ELSASYVYLS  | M--AYYFDRD | DVALNNFFKF | FKEQSH <del>EE</del> ERE | HAEKLMAYQN | KRGGRIILLQD | VKKPERDEWG  |

(continued)

|                              | 110         | 120        | 130        | 140        | 150        | 160        | 170        | 180         | 190        |        |
|------------------------------|-------------|------------|------------|------------|------------|------------|------------|-------------|------------|--------|
| <b>H1</b>                    | SGVEALESSL  | QLEKSVNQSL | LDLHKVCSEH | NDPHMCDFIE | THYLDEQVKS | IKELGDWVTN | LRRMGA---- | ----PQNGMA  | EYLFDKHTLG | KEST-- |
| <b>H2</b>                    | SGVEALESAL  | QLEKIVNQSL | LDLHKVCSEH | NDPHLCDFIE | THYLDEQVKS | IKELGDWVTN | LRRMGA---- | ----PQNGMA  | EYLFDKHTLG | KEST-- |
| <i>D. rerio</i> 4            | SGVEALECAL  | QLEKSVNHSL | LELHKLASQH | NDPHMCDFIE | THYLDEQVKS | IKELGDHVTN | LRRMGA---- | ----PQNGMA  | EYMFDKLTGL | KESS-- |
| <i>T. bernacchii</i> H       | SGLDALECAL  | QLEKSNVQSL | LDLHKVCSEH | NDPHMCDFLE | THYLDEQVKS | IKELGDWVTN | LRLRGA---- | ----PQNGMA  | EYLFDKHTLG | K----- |
| <i>T. newnesi</i> H          | SGLDALECAL  | QLEKSNVQSL | LDLHKVCSEH | NDPHMCDFLE | THYLDEQVKS | IKELGDWVTN | LRLRGA---- | ----PQNGMA  | EYLFDKHTLG | K----- |
| <i>D. labrax</i> H           | SGIEALECAL  | QLEKSVNQSL | LDMHKLCSDH | NDPHLCDFIE | THYLDEQVKS | IKELADWVTN | LRRMGA---- | ----PQNGMA  | EYLFDKHTLG | KESS-- |
| <i>S. maximus</i> H          | SGVRLNVAL   | QLEKSVNQSL | LDLHKLCSH  | NDPHMCDFIE | THYLDEQVKS | IKELADWVTN | LRRMGA---- | ----PKDGM   | EYLFDKHTLG | KESS-- |
| <i>P. crocea</i> H           | SGIEALECAL  | QLEKSVNQSL | LDMHKLCSDH | NDPHMCDFIE | THYLDEQVKS | IKELADWVTN | LRRMGA---- | ----PQNGMA  | EYLFDKHTLG | KESS-- |
| <i>S. salar</i> H            | SGVEALESSL  | QLEKSVNQSL | LDLHKVCSEH | NDPHMCDFIE | THYLDEQVKS | IKELGDWVTN | LRRMGA---- | ----PQNGMA  | EYLFDKHTLG | KEST-- |
| <i>X. tropicalis</i> 3       | NGLEALECSSL | QLEKSVNQSL | LELHKLSTDH | NDPHLCDFLE | SHYLDEQVKS | MKELGDHITN | LRRMGA---- | ----PSNGMA  | EYLFDKHTLG | EHHD-- |
| <i>H. sapiens</i> H          | SGLNAMECAL  | HLEKSNVQSL | LELHKLATDK | NDPHLCDFIE | THYLNEQVKA | IKELGDHVTN | LRRMGA---- | ----PESGLA  | EYLFDKHTLG | DSDNES |
| <i>M. musculus</i> H         | SGLNAMECAL  | HLEKSNVQSL | LELHKLATDK | NDPHLCDFIE | TYLSEQVKS  | IKELGDHVTN | LRRMGA---- | ----PEAGMA  | EYLFDKHTLG | HGDES- |
| <i>R. norvegicus</i> H       | SGLNAMRCAL  | HLEKSNVQSL | LELHKLATDK | NDPHLCDFIE | THYLNEQVKS | IKELGDHVTN | LRRMGA---- | ----PESGMA  | EYLFDKHTLG | HGDES- |
| <i>B. taurus</i> H           | NGLTAMECAL  | CLERSVNQSL | LELHKLATEK | NDPHLCDFIE | THYLNEQVEA | IKELGDHITN | LRRMGA---- | ----PGSGMA  | EYLFDKHTLG | HSES-- |
| <i>E. caballus</i> H         | NGLKAMECAL  | HLEKSNVESL | LELHKLATDK | NDPHLCDFLE | THYLNEQVKA | IKELGDHVTN | LRRMGA---- | ----PESGMA  | EYLFDKHTLG | ECDES- |
| <b>M1</b>                    | NGLEAMQCAL  | QLEKSNVQAL | LDLHKIASDK | VDPHLCDFLE | THYLNEQVEA | IKKLGDHITN | LSRMDA---- | ----VKNKMA  | EYLFDKHTLG | GQS--- |
| <b>M2</b>                    | NGVEAMQCAL  | QLEKSNVQAL | LDLHKIALDK | VDPHLCDFLE | THYLNEQVEA | IKKLGDHITN | LSRMDA---- | ----VKNKMA  | EYLFDKHTLG | GQS--- |
| <b>M3</b>                    | NGLEAMQCAL  | QLEKSNVQAL | LDLHKIASDK | VDPHLCDFLE | THYLNEQVEA | IKKLGDHITN | LSRMDA---- | ----VKNKMA  | EYLFDKHTLR | GQS--- |
| <i>D. rerio</i> 1            | NGLIAMQCAL  | QLEKSNVQAL | LDLHKLATEM | GDPHLCDFLE | THYLDEQVEA | IKKLGDHITN | LSKMDA---- | ----GNNRMA  | EYLFDKQTL- | -DS--- |
| <i>D. rerio</i> 2            | NGLTAMQCAL  | QLEKSNVQAL | LDLHKVASQK | GDPHLCDFLE | THYLNEQVEA | IKKLGDHITN | LSKMDA---- | ----GNNRMA  | EYLFDKHTL- | -DS--- |
| <i>D. rerio</i> 3            | NGLTAMQCAL  | QLEKSNVQAL | LDLHKVASQK | GDPHLCDFLE | SHYLNEQVEA | IKKLGDHITN | LSKMDA---- | ----GNNRMA  | EYLFDKHTL- | -DS--- |
| <i>D. rerio</i> 5            | NGLIAMQCAL  | QLEKSNVQAL | LDLHKLATEM | GDPHLCDFLE | THYLNEQVEA | IKKLGDHITN | LSKMDA---- | ----GNNRMA  | EYLFDKHTL- | -DS--- |
| <i>T. bernacchii</i> M (spl) | NGVDVMQCAL  | QLEKSNVQAL | LDLHKIASGK | VDPHLCDFLE | THYLNEQVES | IKKLGDFITN | LSRMDA---- | ----VKNKMA  | EYLFDKHTMG | GKN--- |
| <i>T. bernacchii</i> M (liv) | SGLDALQSSL  | QLEKSNVQAL | LDLHKIASDH | TDPHLCDFLE | THYLNEQVES | IKKLGDFITN | LSRMDA---- | ----VKNKMA  | EYLFDKHTMG | GKN--- |
| <i>T. newnesi</i> M          | SGLDALQSSL  | QLEKSNVQAL | LDLHKIASDH | TDPHLCDFLE | THYLNEQVES | IKKLGDFITN | LSRMDA---- | ----VKNKMA  | EYLFDKHTMG | GKN--- |
| <i>S. maximus</i> M          | SGLEAMQCAL  | QLEKSNVQAL | LDLHKLASDH | VDPHLCDFLE | THYLNEQVEA | IKKLGDIYSN | LTRMDA---- | ----KNNKMA  | EYLFDKHSLG | GKS--- |
| <i>P. crocea</i> M           | SGLEAMQCAL  | QLEKSNVQAL | LDLHKLASEH | VDPHLCDFLE | SHYLNEQVEA | IKKLGDIYSN | LTRMDA---- | ----HTNKMA  | EYLFDKHTLG | GKS--- |
| <i>S. ocellatus</i> M        | SGLEAMQCAL  | QLEKSNVQAL | LDLHKLASEH | VDPHLCDFLE | THYLNEQVEA | IKKLGDIYSN | LSRMDA---- | ----NTNKMA  | EYLFDKHSLG | GKS--- |
| <i>O. mykiss</i> H1          | NGLEAMQCAL  | QLEKSNVQAL | LDLHKIASGK | VDPHLCDFLE | THYLNEQVEA | IKKLGDHITN | LSRMDA---- | ----VKNKMA  | EYLFDKHTLG | GQS--- |
| <i>O. mykiss</i> H2          | NGLEAMQCAL  | QLEKSNVQAL | LDLHKIASGK | VDPHLCDFLE | THYLNEQVEA | IKKLGDHITN | LSRMDA---- | ----VKNKMA  | EYLFDKHTLG | GQS--- |
| <i>O. mykiss</i> H3          | NGLEAMQCAL  | QLEKSNVQAL | LDLHKIASGK | VDPHLCDFLE | THYLNEQVEA | IKKLGDHITN | LSRMDA---- | ----VKNKMA  | EYLFDKHTLG | GQS--- |
| <i>S. salar</i> M            | NGLEAMQCAL  | QLEKSNVQAL | LDLHKIASDK | VDPHLCDFLE | THYLNEQVEA | IKKLGDHITN | LSRMDA---- | ----VKNKMA  | EYLFDKHTLG | GQS--- |
| <i>X. tropicalis</i> 1       | STLDAMQCAL  | DLEKSNVQAL | LDLHNLATER | KDPHICDFLE | SEHLDEEVK  | MKFGDHITN  | LKRLGV---- | ----PQNGMG  | EYLFDKHSLG | -----  |
| <i>X. tropicalis</i> 2       | NGTKAMEVAL  | NLEKSNVQAL | LDLHKIATDH | ADPHMCDYLE | SEFLEEVIKI | IKKLGDHITN | LKRVKA---- | ----AEDGGM  | EYLFDKHTLG | DSD--- |
| <i>X. tropicalis</i> 4       | NTLEAMQCAL  | QLEKSNVQAL | LDLHKIASDK | TDPHLCDFLE | SHYLNEQVEA | IKKLGDHITN | LKRLGV---- | ----PQNGMG  | EYLFDKHTLG | ESS--- |
| <i>H. sapiens</i> L          | KTPDAMKAAM  | ALEKSNVQAL | LDLHALGSAR | TDPHLCDFLE | THFLDEEVKL | IKKMGDHITN | LHRLGG---- | ----PEAGLG  | EYLFERLTLK | HD---- |
| <i>M. musculus</i> L         | KTPDAMEAAL  | AMEKSNVQAL | LDLHALGSAR | TDPHLCDFLE | SHYLDKEVKL | IKKMGDHITN | LRRVAGPQPA | QTGAPQGSGLG | EYLFERLTLK | HD---- |
| <i>R. norvegicus</i> L       | KTPDAMEAAL  | AMEKSNVQAL | LDLHALGSAR | TDPHLCDFLE | SHFLDKEVKL | IKKMGDHITN | LRRVAGPQPA | QTGVAQASLG  | EYLFERLTLK | HD---- |
| <i>B. taurus</i> L           | KTPDAMEAAL  | LVEKSNVQAL | LDLHGLASAR | GDPHICDFLE | NHFLDEEVKL | IKKMGDHITN | LRLRAG---- | ----PQAGLG  | EYLFERLTLK | HD---- |
| <i>E. caballus</i> L         | TTLDAMKAAL  | VLEKSNVQAL | LDLHALGSAQ | ADPHLCDFLE | SHFLDEEVKL | IKKMGDHITN | IQLRVG---- | ----SQAGLG  | EYLFERLTLK | HD---- |
| <i>P. marinus</i>            | SGLEAVQCAL  | QLEKSNVQAL | LDLHALGSAQ | NDPQLCDFLE | SHYLEEVEA  | IKKLGDFVTN | LKRLGA---- | ----SQSGMG  | EYLFDKHTLG | SSS--- |
