# Supplementary material for: Cloning and Characterisation of Multiple Ferritin Isoforms in the Atlantic Salmon (Salmo salar)
Source: PubMed Central journal article supplement (PMC4117605; doi:10.1371/journal.pone.0103729), 2014-07-31
Supplement: pone.0103729.s003.pdf [file pone.0103729.s003.pdf]

**Supplementary Table 1:** List of sequences used in phylogenetic analysis

| <b>Species *</b>                  | <b>Accession number</b> |
|-----------------------------------|-------------------------|
| <i>Danio rerio</i> (E)            | ENSDARG00000079938      |
|                                   | ENSDARG00000031776      |
|                                   | ENSDARG00000078342      |
|                                   | ENSDARG00000015551      |
|                                   | ENSDARG00000073936      |
| <i>Gasterosteus aculeatus</i> (E) | ENSGACP00000007931      |
|                                   | ENSGACP00000007905      |
|                                   | ENSGACP00000020445      |
| <i>Tetraodon nigroviridis</i> (E) | ENSTNIG00000011144      |
|                                   | ENSTNIG00000004260      |
| <i>Takifugu rubripes</i> (E)      | ENSTRUG00000014292      |
|                                   | ENSTRUG00000017266      |
| <i>Oryzias latipes</i> (E)_       | ENSORLG00000016761      |
|                                   | ENSORLG00000005872      |
| <i>Oreochromis niloticus</i> (E)  | ENSONIG00000006516      |
|                                   | ENSONIG00000002989      |
| <i>Xiphophorus maculatus</i> (E)  | ENSXMAG00000008596      |
|                                   | ENSXMAG00000018294      |
| <i>Salmo salar</i> (U)            | P49946                  |
|                                   | P49947                  |
| <i>Trematomus bernacchii</i> (U)  | P85838                  |
|                                   | P85836                  |
|                                   | P85839                  |
| <i>Trematomus newnesi</i> (U)     | P85837                  |
|                                   | P85835                  |
| <i>Dicentrarchus labrax</i> (G)   | ACN80998.1              |
| <i>Scophthalmus maximus</i> (G)   | ADI24353.1              |
|                                   | ADI24354.1              |
| <i>Pseudosciaena crocea</i> (G)   | ACY75475.1              |
|                                   | ACY75476.1              |
| <i>Sciaenops ocellatus</i> (G)    | ADF80517.1              |
| <i>Oncorhynchus mykiss</i> (G)    | NP_001118019.1          |
|                                   | NP_001118020.1          |
|                                   | NP_001118021.1          |
| <i>Xenopus tropicalis</i> (E)     | ENSXETG00000021234      |
|                                   | ENSXETG00000006737      |
|                                   | ENSXETG00000021237      |

|                                |                    |
|--------------------------------|--------------------|
|                                | ENSXETG00000021236 |
| <i>Taeniopygia guttata</i> (E) | ENSTGUG00000005949 |
|                                | ENSTGUG00000015659 |
| <i>Homo sapiens</i> (U)        | P02794             |
|                                | P02792             |
| <i>Mus musculus</i> (U)        | P09528             |
|                                | P29391             |
| <i>Rattus norvegicus</i> (U)   | P19132             |
|                                | P02793             |
| <i>Bos taurus</i> (U)          | O46414             |
|                                | O46415             |
| <i>Equus caballus</i> (U)      | Q8MIP0             |
|                                | P02791             |
| <i>Canis familiaris</i> (U)    | Q95MP7             |
|                                | Q53VB8             |
| <i>Sus scrofa</i> (E)          | ENSSSCP00000003417 |
|                                | ENSSSCP00000026601 |
| <i>Petromyzon marinus</i> (U)  | AAN63033           |

\*Database source: E – Ensembl, U – UniProt/SwissProt, G – GenBank
