# Supplementary material for: Cloning and Characterisation of Multiple Ferritin Isoforms in the Atlantic Salmon (Salmo salar)
Source: PubMed Central journal article supplement (PMC4117605; doi:10.1371/journal.pone.0103729), 2014-07-31
Supplement: pone.0103729.s004.pdf [file pone.0103729.s004.pdf]

**Supplementary Table 2:** List of  $d_N/d_S$  values between ferritin isoforms in *S. salar* and *O. mykiss*.

| Sequence pair                           | $d_N/d_S$ |
|-----------------------------------------|-----------|
| H1 – H2                                 | 0.1364    |
| H1 – M1                                 | 0.0915    |
| H1 – M2                                 | 0.0894    |
| H1 – M3                                 | 0.1002    |
| H2 – M1                                 | 0.1181    |
| H2-M2                                   | 0.0862    |
| H2-M3                                   | 0.0848    |
| M1-M2                                   | 0.0564    |
| M1-M3                                   | 0.0525    |
| M2-M3                                   | 0.1066    |
| <i>O.mykiss</i> H1- <i>O.mykiss</i> H2  | 0.1499    |
| <i>O.mykiss</i> H1 - <i>O.mykiss</i> H3 | 0.047     |
| <i>O.mykiss</i> H2 - <i>O.mykiss</i> H3 | 0.0412    |
